# Supplementary material for: Crucial role of pro-inflammatory cytokines from respiratory tract upon PM2.5 exposure in causing the BMSCs differentiation in cells and animals
Source: PubMed Central journal article supplement (PMC5788596; doi:10.18632/oncotarget.23158), 2017-12-11
Supplement: oncotarget-09-1745-s001.pdf [file oncotarget-09-1745-s001.pdf]

## Crucial role of pro-inflammatory cytokines from respiratory tract upon PM<sub>2.5</sub> exposure in causing the BMSCs differentiation in cells and animals

### SUPPLEMENTARY MATERIALS

#### Immuno-histochemical analysis

Rats were killed by anesthesia (sodium pentobarbital, 80 mg/kg, i.p.) 24 hours after the last treatment. Lung and bronchial tissues were immediately removed, washed in sterile 0.9% (w/v) sodium chloride solution and cut into two parts. One part was immediately fixed in 10% formalin over 24 hours, dehydrated and then embedded in paraffin wax. The section was used for histopathological examination and stained with antibodies to IL-1 $\beta$ , COX-2 and NF- $\kappa$ B.

After washing, they were stained with horseradish peroxidase-conjugated secondary antibody (ZSGB-BIO, China), incubated with streptavidin-horseradish peroxidase complex, stained with diaminobenzidine (DAB), and then counterstained with hematoxylin. The remaining part was collected in RNasefree tubes and snapped frozen in liquid nitrogen. The frozen tissues were stored at  $-80^{\circ}\text{C}$  until these tissues were used for RNA extraction.

**Supplementary Table 1: Primers of human used for quantitative real-time polymerase chain reaction (qRT-PCR)**

| Gene                | Primers | Sequences (5'→3')         |
|---------------------|---------|---------------------------|
| CD31                | Forward | AGACGTGCAGTACACGGAAG      |
|                     | Reverse | AGTATCTGCTTTCCACGGCA      |
| vWF                 | Forward | GCGTTATAACAGCTGTGCG       |
|                     | Reverse | GACAGTGTGCAGGGTCATCA      |
| a-SMA               | Forward | AGCGTGGCTATTCTTCGT        |
|                     | Reverse | CCATCAGGCAACTCGTAACTC     |
| IL-1 $\beta$        | Forward | TTACAGTGGCAATGAGGATG      |
|                     | Reverse | TGTAGTGGTGGTCGGAGATT      |
| IL-6                | Forward | CCTTCGGTCCAGTTGCCTTCT     |
|                     | Reverse | CAGTGCCTCTTTGCTGCTTTC     |
| IL-10               | Forward | AGAACCAAGACCCAGACATCA     |
|                     | Reverse | GCATTCTTCACCTGCTCCAC      |
| TNF $\beta$ 1       | Forward | CGAGTGACAAGCCTGTAGCC      |
|                     | Reverse | TGAAGAGGACCTGGGAGTAGAT    |
| iNOS                | Forward | CAGGACTCACAGCCTTTGGA      |
|                     | Reverse | CTGGATGTCGGACTTTGTAGATT   |
| COX-2               | Forward | GTCTAAATCGGGAGTTGGAATCA   |
|                     | Reverse | CACAGTATGACACAACAGCCCA    |
| NOX1                | Forward | CACAAGAAAAATCCTTGGGTCAA   |
|                     | Reverse | GACAGCAGATTGCGACACACA     |
| NOX2                | Forward | CCTAAGATAGCGGTTGATGG      |
|                     | Reverse | GACTTGAGAATGGATGCGAA      |
| p22 <sup>phox</sup> | Forward | CGCTGGCGTCCGCCTGATCCTCA   |
|                     | Reverse | ACGCACAGCCGCCAGTAGGTAGAT  |
| p40 <sup>phox</sup> | Forward | TGAACAGCTTCCGGATGATG      |
|                     | Reverse | TGAAGCCTCTCTTCTCCTCGAT    |
| p47 <sup>phox</sup> | Forward | GTCAGATGAAAGCAAAGCGA      |
|                     | Reverse | CATAGTTGGGCTCAGGGTCT      |
| p67 <sup>phox</sup> | Forward | ATCAGCCTCTGGAATGAAGGGG    |
|                     | Reverse | GCAGCCAATGTTGAAGCAAATCC   |
| NDUFS2              | Forward | TGAGTTCTACGAGCGAGTGTCTGG  |
|                     | Reverse | CGAAGCATCACTCCACTAAAACCAT |
| SDHD                | Forward | TTCTTTCGTCGTCGTGGGTGG     |
|                     | Reverse | GCTCGGTGACAAGTGTATGTGCTG  |
| UQCR11              | Forward | GTGATGTATCTGGGTGTTGTGG    |
|                     | Reverse | ACTGTGGCTTGCTCCTTCCTCT    |
| COX4I1              | Forward | GCTACCCTTTTCCGCTCCACG     |
|                     | Reverse | AGCCAACATTCTGCCGCCACT     |
| GAPDH               | Forward | GCACCGTCAAGGCTGAGAAC      |
|                     | Reverse | TGGTGAAGACGCCAGTGGA       |

**Supplementary Table 2: Primers of rat used for quantitative real-time polymerase chain reaction (qRT-PCR)**

| Gene          | Primers | Sequences (5'→3')        |
|---------------|---------|--------------------------|
| CD31          | Forward | TCTCTGCCTGATGAGTCTGC     |
|               | Reverse | CTCTGAGATGGCTGGTGTGG     |
| vWF           | Forward | GGTGGAGGAAGACCCCATG      |
|               | Reverse | GATGTCCAGGTATGGCTCGG     |
| a-SMA         | Forward | TCATTGGAATGGAGTCGGCG     |
|               | Reverse | TTTGC GTTCTGGAGGAGCAATAA |
| Fap           | Forward | TAGCAGTGGCTCCAGTCTCC     |
|               | Reverse | GCTCTTGCCATCACAGTTGA     |
| IL-1 $\beta$  | Forward | GCCTCAAGGGGAAGAATCTATACC |
|               | Reverse | GGGAACTGTGCAGACTCAAACCT  |
| IL-6          | Forward | TCCTACCCCAACTTCCAATGCTC  |
|               | Reverse | TTGGATGGTCTTGGTCCTTAGCC  |
| IL-10         | Forward | ACTGGCTGGAGTGAAGACCA     |
|               | Reverse | CTTGGCAACCCAAGTAACCC     |
| TNF $\beta$ 1 | Forward | ACGTCGTAGCAAACCACCAA     |
|               | Reverse | AAATGGCAAATCGGCTGACG     |
| iNOS          | Forward | CACAGAGGGCTCAAAGGAGG     |
|               | Reverse | AAAGTGGTAGCCACATCCCG     |
| COX-2         | Forward | CTTCGGGAGCACAACAGAGT     |
|               | Reverse | AAGTGGTAACCGCTCAGGTG     |
| Actin         | Forward | CCTCTATGCCAACACAGTGC     |
|               | Reverse | ATACTCCTGCTTGCTGATCC     |

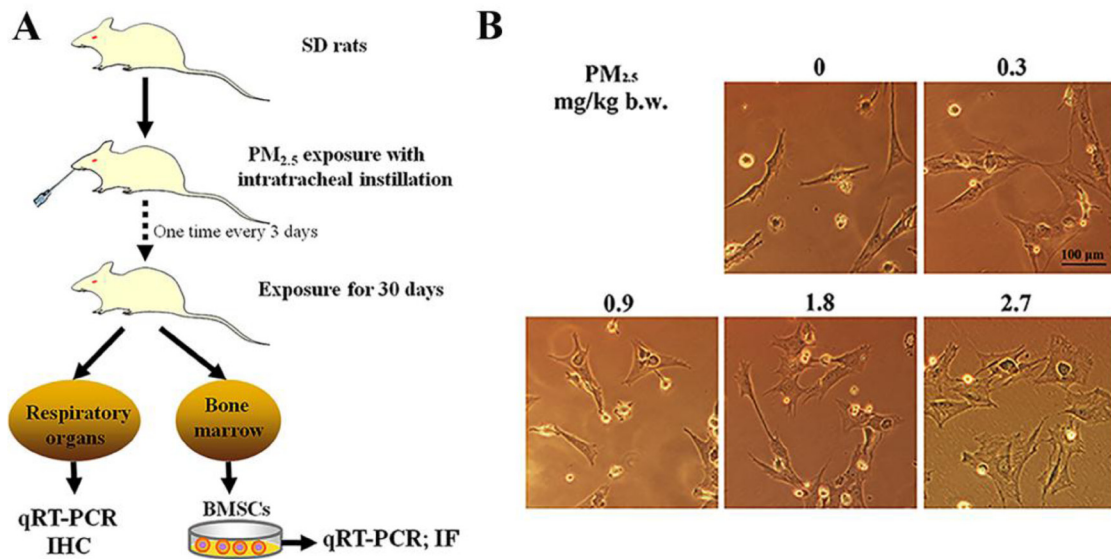

**Supplementary Figure 1: The *in vivo* experimental protocol and effects of PM<sub>2.5</sub> on alterations of BMSCs morphology.** Experimental protocol for PM<sub>2.5</sub>-exposed SD rats. The morphology of BMSCs was observed using inverted microscope (20 $\times$ ). Scale bars are 100  $\mu$ m.

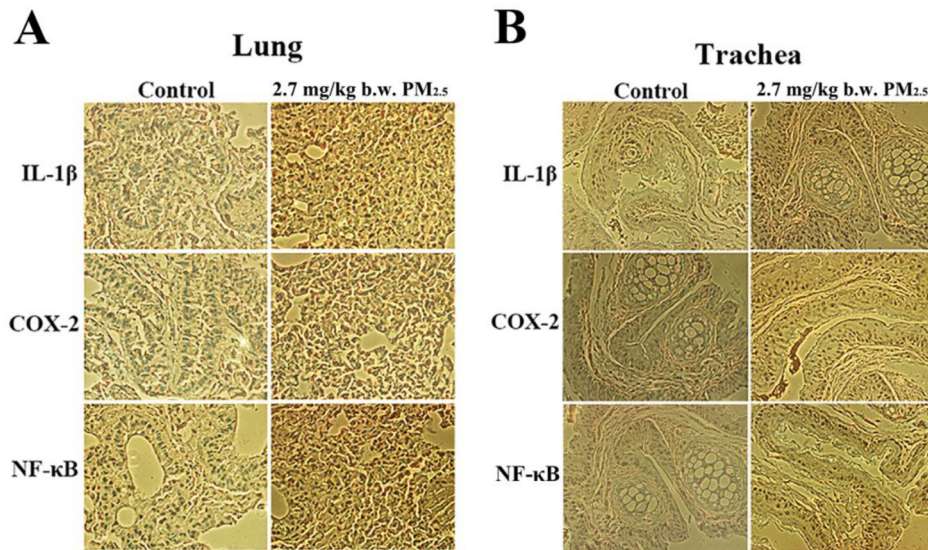

**Supplementary Figure 2: Inflammatory response caused by PM<sub>2.5</sub> in lung and bronchial tissues.** Immunohistochemistry analysis was carried out to determine the expressions of IL-1β, COX-2 and NF-κB in (A) lung tissues and (B) bronchial tissues. The image was observed using inverted microscope (20×).

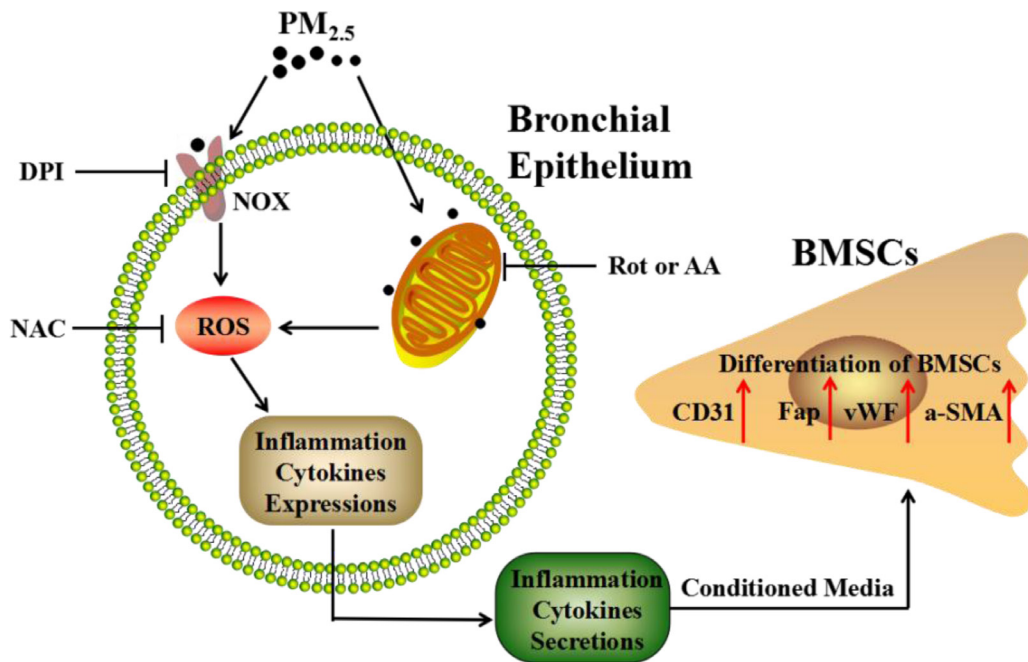

**Supplementary Figure 3: The proposed model of PM<sub>2.5</sub>-induced inflammatory cytokines leading to the differentiation of BMSCs into ELCs and CAFs.** PM<sub>2.5</sub> exposure elevated the ROS generation via binding to cell membrane-bound NOX and causing mitochondrial disorder, which further provoked the inflammatory cytokine expressions and secretions in respiratory tract. Moreover, the secretions promoted the differentiation of BMSCs into ELCs and CAFs.

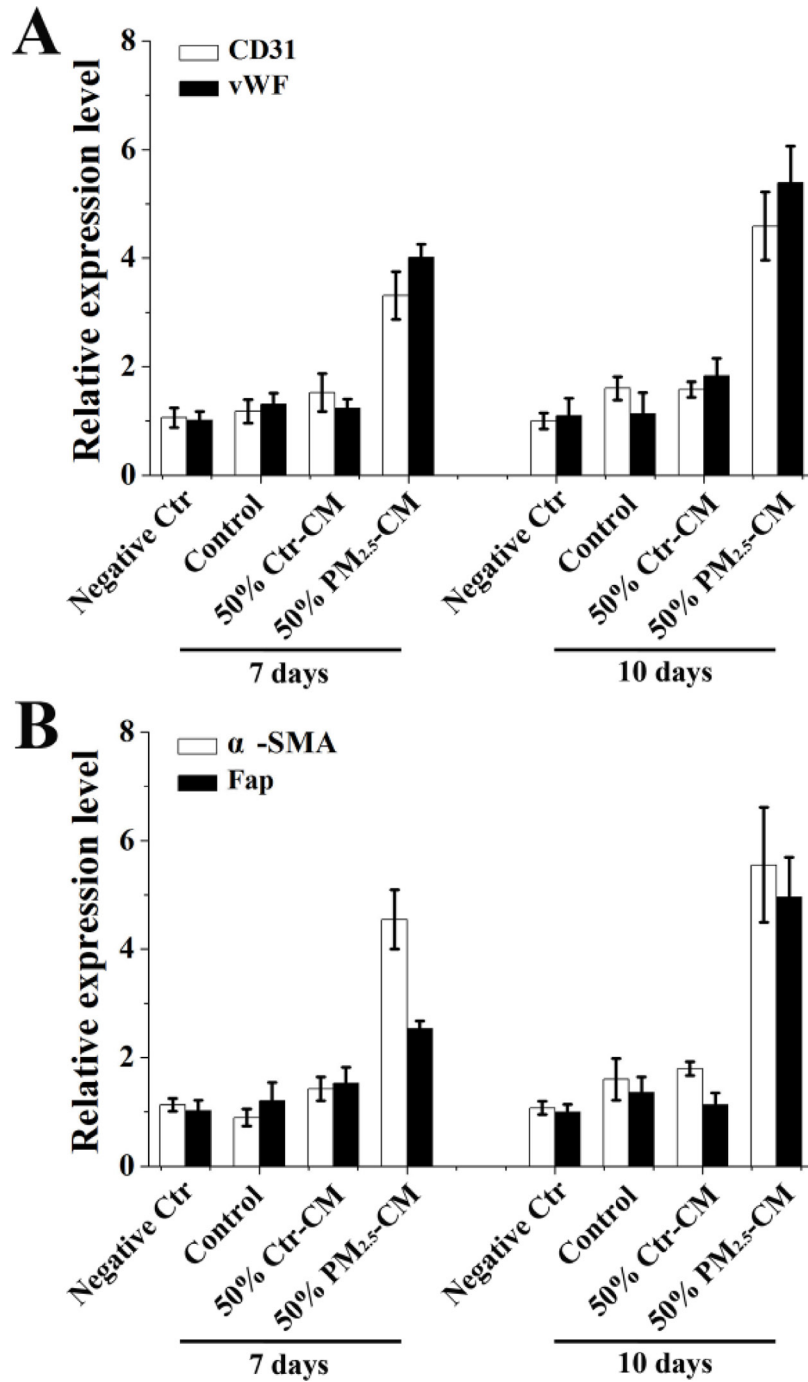

**Supplementary Figure 4: The effects of CM from negative control, control and PM<sub>2.5</sub>-exposed 16HBE cells on BMSCs differentiation.** mRNA levels of (A) CD31, vWF, (B) α-SMA and Fap were measured in BMSCs. The values were showed as means ± SD of triplicate determinations. \**p* < 0.05, \*\**p* < 0.01, compared with control.
